# Supplementary material
Source: PubMed Central journal article supplement (PMC2811067)
Supplement: NIHMS166113-supplement-2.pdf [file NIHMS166113-supplement-2.pdf]

Goldstone, JV. Environmental sensing and response genes in Cnidaria: the chemical defensome in the sea anemone *Nematostella vectensis*

### Supplemental Data

Figure S1. Maximum likelihood phylogenetic tree of cytochrome P450 (CYP) predicted and known protein sequences from *Homo sapiens* (hs, blue), *Strongylocentrotus purpuratus* (Strpu, purple), *Drosophila melanogaster* (drome, green) and *Nematostella vectensis* (Nemve1, red). Sequences were aligned with Muscle (v3.6) and automatically masked using the alignment quality score. Maximum likelihood analysis was performed using the PROTMIXWAGF model in RAxML (v7.0.3).

Table S1. JGI model numbers for ABC, SLC21, and SLC22 (transporter) genes in *N. vectensis* genome assembly version 1.

Table S2. JGI model numbers for oxidative and reducing genes in *N. vectensis* genome assembly version 1.

Table S3. JGI model numbers for conjugating genes in *N. vectensis* genome assembly version 1.

Table S4. JGI model numbers for antioxidant and metal conjugating genes in *N. vectensis* genome assembly version 1.



## Supplemental Table S1

| <b>JGI Protein Model</b> | <b>Gene family assignment</b> |
|--------------------------|-------------------------------|
| Nemve1 102               | ABC transporter, ABCC         |
| Nemve1 4776              | ABC transporter, ABCC         |
| Nemve1 10039             | ABC transporter, ABCC1        |
| Nemve1 10108             | ABC transporter, ABCC1        |
| Nemve1 10208             | ABC transporter, ABCC         |
| Nemve1 10332             | ABC transporter, ABCC         |
| Nemve1 20036             | ABC transporter, ABCC4        |
| Nemve1 20166             | ABC transporter, ABCC4        |
| Nemve1 23523             | ABC transporter, ABCG4        |
| Nemve1 30195             | ABC transporter, ABCA3        |
| Nemve1 30362             | ABC transporter, ABCC4        |
| Nemve1 31495             | ABC transporter, ABCB9        |
| Nemve1 50359             | ABC transporter, ABCG         |
| Nemve1 82183             | ABC transporter, ABCB1        |
| Nemve1 82333             | ABC transporter, ABCA3        |
| Nemve1 84633             | ABC transporter, ABCC         |
| Nemve1 87084             | ABC transporter, ABCC         |
| Nemve1 87844             | ABC transporter, ABCA2        |
| Nemve1 88546             | ABC transporter, ABCC10       |
| Nemve1 94692             | ABC transporter, ABCC         |
| Nemve1 97844             | ABC transporter, ABCC1        |
| Nemve1 99374             | ABC transporter, ABCG2        |
| Nemve1 99533             | ABC transporter, ABCC         |
| Nemve1 103967            | ABC transporter, ABCG         |
| Nemve1 104944            | ABC transporter, ABCC         |
| Nemve1 113115            | ABC transporter, ABCC         |
| Nemve1 113931            | ABC transporter, ABCC4        |
| Nemve1 115547            | ABC transporter, ABCC         |
| Nemve1 116645            | ABC transporter, ABCG4        |
| Nemve1 116678            | ABC transporter, ABCC         |
| Nemve1 116684            | ABC transporter, ABCC         |
| Nemve1 118015            | ABC transporter, ABCC4        |
| Nemve1 124699            | ABC transporter, ABCC         |
| Nemve1 130091            | ABC transporter, ABCC         |
| Nemve1 134819            | ABC transporter, ABCA         |
| Nemve1 134820            | ABC transporter, ABCA         |
| Nemve1 136552            | ABC transporter, ABCC11       |
| Nemve1 139647            | ABC transporter, ABCC         |
| Nemve1 139660            | ABC transporter, ABCC         |
| Nemve1 139662            | ABC transporter, ABCC         |
| Nemve1 139684            | ABC transporter, ABCC         |
| Nemve1 139853            | ABC transporter, ABCC         |
| Nemve1 146653            | ABC transporter, ABCC         |
| Nemve1 159164            | ABC transporter, ABCC         |
| Nemve1 166963            | ABC transporter, ABCC         |
| Nemve1 168119            | ABC transporter, ABCD4        |
| Nemve1 168315            | ABC transporter, ABCG4        |
| Nemve1 168501            | ABC transporter, ABCB10       |
| Nemve1 168693            | ABC transporter, ABCC         |
| Nemve1 172449            | ABC transporter, ABCF1        |
| Nemve1 180295            | ABC transporter, ABCC4        |
| Nemve1 190171            | ABC transporter, ABCC1        |
| Nemve1 190285            | ABC transporter, ABCF3        |
| Nemve1 195521            | ABC transporter, ABCD4        |
| Nemve1 206043            | ABC transporter, ABCB10       |

| <b>JGI Protein Model</b> | <b>Gene family assignment</b>         |
|--------------------------|---------------------------------------|
| Nemve1 216377            | ABC transporter, ABCA                 |
| Nemve1 224771            | ABC transporter, ABCF                 |
| Nemve1 234370            | ABC transporter, ABCC                 |
| Nemve1 234439            | ABC transporter, ABCC                 |
| Nemve1 237874            | ABC transporter, ABCB1                |
| Nemve1 243828            | ABC transporter, ABCD4                |
| Nemve1 244883            | ABC transporter, ABCF                 |
| Nemve1 245176            | ABC transporter, ABCD1                |
| Nemve1 246933            | ABC transporter, ABCD3                |
| Nemve1 247032            | ABC transporter, ABCC                 |
| Nemve1 11296             | Organic Anion Transporter Polypeptide |
| Nemve1 20640             | Organic Anion Transporter Polypeptide |
| Nemve1 31122             | Organic Anion Transporter Polypeptide |
| Nemve1 51341             | Organic Anion Transporter Polypeptide |
| Nemve1 52639             | Organic Anion Transporter Polypeptide |
| Nemve1 104948            | Organic Anion Transporter Polypeptide |
| Nemve1 105114            | Organic Anion Transporter Polypeptide |
| Nemve1 119016            | Organic Anion Transporter Polypeptide |
| Nemve1 125243            | Organic Anion Transporter Polypeptide |
| Nemve1 136329            | Organic Anion Transporter Polypeptide |
| Nemve1 205781            | Organic Anion Transporter Polypeptide |
| Nemve1 210013            | Organic Anion Transporter Polypeptide |
| Nemve1 211340            | Organic Anion Transporter Polypeptide |
| Nemve1 215081            | Organic Anion Transporter Polypeptide |
| Nemve1 218525            | Organic Anion Transporter Polypeptide |
| Nemve1 222752            | Organic Anion Transporter Polypeptide |
| Nemve1 247942            | Organic Anion Transporter Polypeptide |
| Nemve1 1130              | SLC22 Family                          |
| Nemve1 8463              | SLC22 Family                          |
| Nemve1 10639             | SLC22 Family                          |
| Nemve1 14487             | SLC22 Family                          |
| Nemve1 21316             | SLC22 Family                          |
| Nemve1 40646             | SLC22 Family                          |
| Nemve1 40753             | SLC22 Family                          |
| Nemve1 47059             | SLC22 Family                          |
| Nemve1 50785             | SLC22 Family                          |
| Nemve1 60630             | SLC22 Family                          |
| Nemve1 61471             | SLC22 Family                          |
| Nemve1 63188             | SLC22 Family                          |
| Nemve1 85329             | SLC22 Family                          |
| Nemve1 86395             | SLC22 Family                          |
| Nemve1 89058             | SLC22 Family                          |
| Nemve1 90692             | SLC22 Family                          |
| Nemve1 91052             | SLC22 Family                          |
| Nemve1 94638             | SLC22 Family                          |
| Nemve1 101713            | SLC22 Family                          |
| Nemve1 101715            | SLC22 Family                          |
| Nemve1 104560            | SLC22 Family                          |
| Nemve1 109102            | SLC22 Family                          |
| Nemve1 109190            | SLC22 Family                          |
| Nemve1 111000            | SLC22 Family                          |
| Nemve1 115717            | SLC22 Family                          |
| Nemve1 118993            | SLC22 Family                          |
| Nemve1 119271            | SLC22 Family                          |
| Nemve1 122742            | SLC22 Family                          |
| Nemve1 123813            | SLC22 Family                          |
| Nemve1 125326            | SLC22 Family                          |

| <b>JGI Protein Model</b> | <b>Gene family assignment</b> |
|--------------------------|-------------------------------|
| Nemve1 128943            | SLC22 Family                  |
| Nemve1 128952            | SLC22 Family                  |
| Nemve1 131775            | SLC22 Family                  |
| Nemve1 138108            | SLC22 Family                  |
| Nemve1 145688            | SLC22 Family                  |
| Nemve1 146442            | SLC22 Family                  |
| Nemve1 149554            | SLC22 Family                  |
| Nemve1 160661            | SLC22 Family                  |
| Nemve1 165851            | SLC22 Family                  |
| Nemve1 165915            | SLC22 Family                  |
| Nemve1 170798            | SLC22 Family                  |
| Nemve1 172071            | SLC22 Family                  |
| Nemve1 173562            | SLC22 Family                  |
| Nemve1 174480            | SLC22 Family                  |
| Nemve1 200404            | SLC22 Family                  |
| Nemve1 202226            | SLC22 Family                  |
| Nemve1 205215            | SLC22 Family                  |
| Nemve1 205600            | SLC22 Family                  |
| Nemve1 206126            | SLC22 Family                  |
| Nemve1 207968            | SLC22 Family                  |
| Nemve1 207969            | SLC22 Family                  |
| Nemve1 208384            | SLC22 Family                  |
| Nemve1 211167            | SLC22 Family                  |
| Nemve1 219492            | SLC22 Family                  |
| Nemve1 220670            | SLC22 Family                  |
| Nemve1 223668            | SLC22 Family                  |
| Nemve1 224087            | SLC22 Family                  |
| Nemve1 224161            | SLC22 Family                  |
| Nemve1 225531            | SLC22 Family                  |
| Nemve1 240064            | SLC22 Family                  |
| Nemve1 241870            | SLC22 Family                  |
| Nemve1 241972            | SLC22 Family                  |
| Nemve1 244617            | SLC22 Family                  |

## Supplemental Table S2

| <b>JGI Protein Model</b> | <b>Gene family assignment</b> |
|--------------------------|-------------------------------|
| Nemve1 181421            | aldehyde dehydrogenase        |
| Nemve1 179476            | aldehyde dehydrogenase        |
| Nemve1 200699            | aldehyde dehydrogenase        |
| Nemve1 192075            | aldehyde dehydrogenase        |
| Nemve1 245626            | aldehyde dehydrogenase        |
| Nemve1 162370            | aldehyde dehydrogenase        |
| Nemve1 89632             | aldehyde dehydrogenase        |
| Nemve1 235302            | aldehyde dehydrogenase        |
| Nemve1 231413            | aldehyde dehydrogenase        |
| Nemve1 150665            | aldehyde dehydrogenase        |
| Nemve1 177644            | aldehyde dehydrogenase        |
| Nemve1 149662            | aldehyde dehydrogenase        |
| Nemve1 102986            | aldehyde dehydrogenase        |
| Nemve1 175287            | aldehyde dehydrogenase        |
| Nemve1 186547            | aldehyde dehydrogenase        |
| Nemve1 154509            | aldehyde dehydrogenase        |
| Nemve1 170078            | aldehyde dehydrogenase        |
| Nemve1 156946            | aldehyde dehydrogenase        |
| Nemve1 224399            | aldehyde dehydrogenase        |
| Nemve1 96970             | aldehyde dehydrogenase        |
| Nemve1 3850              | aldehyde dehydrogenase        |
| Nemve1 181888            | Aldo/keto reductase family    |
| Nemve1 224560            | Aldo/keto reductase family    |
| Nemve1 190239            | Aldo/keto reductase family    |
| Nemve1 90844             | Aldo/keto reductase family    |
| Nemve1 208820            | Aldo/keto reductase family    |
| Nemve1 117787            | Aldo/keto reductase family    |
| Nemve1 228986            | Aldo/keto reductase family    |
| Nemve1 71477             | Aldo/keto reductase family    |
| Nemve1 220742            | Aldo/keto reductase family    |
| Nemve1 166341            | Aldo/keto reductase family    |
| Nemve1 163935            | Aldo/keto reductase family    |
| Nemve1 70665             | Aldo/keto reductase family    |
| Nemve1 107875            | Cytochrome P450, CYP Clan 2   |
| Nemve1 116955            | Cytochrome P450, CYP Clan 2   |
| Nemve1 122119            | Cytochrome P450, CYP Clan 2   |
| Nemve1 122140            | Cytochrome P450, CYP Clan 2   |
| Nemve1 12630             | Cytochrome P450, CYP Clan 2   |
| Nemve1 13146             | Cytochrome P450, CYP Clan 2   |
| Nemve1 143569            | Cytochrome P450, CYP Clan 2   |
| Nemve1 147800            | Cytochrome P450, CYP Clan 2   |
| Nemve1 161477            | Cytochrome P450, CYP Clan 2   |
| Nemve1 164344            | Cytochrome P450, CYP Clan 2   |
| Nemve1 164939            | Cytochrome P450, CYP Clan 2   |
| Nemve1 171703            | Cytochrome P450, CYP Clan 2   |
| Nemve1 182833            | Cytochrome P450, CYP Clan 2   |
| Nemve1 197176            | Cytochrome P450, CYP Clan 2   |
| Nemve1 200272            | Cytochrome P450, CYP Clan 2   |
| Nemve1 204234            | Cytochrome P450, CYP Clan 2   |
| Nemve1 206900            | Cytochrome P450, CYP Clan 2   |
| Nemve1 208281            | Cytochrome P450, CYP Clan 2   |
| Nemve1 209361            | Cytochrome P450, CYP Clan 2   |
| Nemve1 217770            | Cytochrome P450, CYP Clan 2   |
| Nemve1 220856            | Cytochrome P450, CYP Clan 2   |

| <b>JGI Protein Model</b> | <b>Gene family assignment</b>   |
|--------------------------|---------------------------------|
| Nemve1 221914            | Cytochrome P450, CYP Clan 2     |
| Nemve1 22420             | Cytochrome P450, CYP Clan 2     |
| Nemve1 227345            | Cytochrome P450, CYP Clan 2     |
| Nemve1 229410            | Cytochrome P450, CYP Clan 2     |
| Nemve1 230060            | Cytochrome P450, CYP Clan 2     |
| Nemve1 231212            | Cytochrome P450, CYP Clan 2     |
| Nemve1 231218            | Cytochrome P450, CYP Clan 2     |
| Nemve1 234104            | Cytochrome P450, CYP Clan 2     |
| Nemve1 234969            | Cytochrome P450, CYP Clan 2     |
| Nemve1 235065            | Cytochrome P450, CYP Clan 2     |
| Nemve1 238893            | Cytochrome P450, CYP Clan 2     |
| Nemve1 33342             | Cytochrome P450, CYP Clan 2     |
| Nemve1 60849             | Cytochrome P450, CYP Clan 2     |
| Nemve1 80762             | Cytochrome P450, CYP Clan 2     |
| Nemve1 82634             | Cytochrome P450, CYP Clan 2     |
| Nemve1 87502             | Cytochrome P450, CYP Clan 2     |
| Nemve1 87891             | Cytochrome P450, CYP Clan 2     |
| Nemve1 94651             | Cytochrome P450, CYP Clan 2     |
| Nemve1 114170            | Cytochrome P450, CYP Clan 3     |
| Nemve1 120897            | Cytochrome P450, CYP Clan 3     |
| Nemve1 120985            | Cytochrome P450, CYP Clan 3     |
| Nemve1 122064            | Cytochrome P450, CYP Clan 3     |
| Nemve1 129215            | Cytochrome P450, CYP Clan 3     |
| Nemve1 12978             | Cytochrome P450, CYP Clan 3     |
| Nemve1 132216            | Cytochrome P450, CYP Clan 3     |
| Nemve1 142057            | Cytochrome P450, CYP Clan 3     |
| Nemve1 175140            | Cytochrome P450, CYP Clan 3     |
| Nemve1 176140            | Cytochrome P450, CYP Clan 3     |
| Nemve1 176175            | Cytochrome P450, CYP Clan 3     |
| Nemve1 181495            | Cytochrome P450, CYP Clan 3     |
| Nemve1 190607            | Cytochrome P450, CYP Clan 3     |
| Nemve1 219163            | Cytochrome P450, CYP Clan 3     |
| Nemve1 220823            | Cytochrome P450, CYP Clan 3     |
| Nemve1 233531            | Cytochrome P450, CYP Clan 3     |
| Nemve1 32720             | Cytochrome P450, CYP Clan 3     |
| Nemve1 32845             | Cytochrome P450, CYP Clan 3     |
| Nemve1 890               | Cytochrome P450, CYP Clan 3     |
| Nemve1 89564             | Cytochrome P450, CYP Clan 3     |
| Nemve1 86714             | Cytochrome P450, CYP Clan 4F    |
| Nemve1 136068            | Cytochrome P450, CYP Clan 4V    |
| Nemve1 194368            | Cytochrome P450, CYP Clan 4V    |
| Nemve1 102678            | Cytochrome P450, CYP Clan Mito  |
| Nemve1 107622            | Cytochrome P450, CYP Clan Mito  |
| Nemve1 122810            | Cytochrome P450, CYP Clan Mito  |
| Nemve1 140839            | Cytochrome P450, CYP Clan Mito  |
| Nemve1 162389            | Cytochrome P450, CYP Clan Mito  |
| Nemve1 176042            | Cytochrome P450, CYP Clan Mito  |
| Nemve1 185054            | Cytochrome P450, CYP Clan Mito  |
| Nemve1 202906            | Cytochrome P450, CYP Clan Mito  |
| Nemve1 83609             | Cytochrome P450, CYP Clan Mito  |
| Nemve1 94936             | Cytochrome P450, CYP Clan Mito  |
| Nemve1 101023            | Cytochrome P450, CYP unassigned |
| Nemve1 101105            | Cytochrome P450, CYP unassigned |
| Nemve1 113799            | Cytochrome P450, CYP unassigned |
| Nemve1 11772             | Cytochrome P450, CYP unassigned |
| Nemve1 124567            | Cytochrome P450, CYP unassigned |
| Nemve1 175215            | Cytochrome P450, CYP unassigned |

| <b>JGI Protein Model</b> | <b>Gene family assignment</b>     |
|--------------------------|-----------------------------------|
| Nemve1 180149            | Cytochrome P450, CYP unassigned   |
| Nemve1 194035            | Cytochrome P450, CYP unassigned   |
| Nemve1 236002            | Cytochrome P450, CYP unassigned   |
| Nemve1 241155            | Cytochrome P450, CYP unassigned   |
| Nemve1 141685            | Epoxide Hydrolase                 |
| Nemve1 231029            | Flavin-binding monooxygenase-like |
| Nemve1 185021            | Flavin-binding monooxygenase-like |
| Nemve1 110766            | Flavin-binding monooxygenase-like |
| Nemve1 235461            | Flavin-binding monooxygenase-like |
| Nemve1 33129             | Flavin-binding monooxygenase-like |
| Nemve1 55039             | Flavin-binding monooxygenase-like |



## Supplemental Table S3

| JGI Protein Model | Gene family assignment                         |
|-------------------|------------------------------------------------|
| Nemve1 178546     | eEF1-gamma                                     |
| Nemve1 237669     | Glutathione S-transferase, GSTtheta            |
| Nemve1 186779     | Glutathione S-transferase, GSTzeta             |
| Nemve1 83876      | Glutathione S-transferase, fungal-type         |
| Nemve1 184426     | Glutathione S-transferase, GSTmu               |
| Nemve1 86756      | Glutathione S-transferase, GSTmu               |
| Nemve1 226731     | Glutathione S-transferase, GSTmu               |
| Nemve1 210927     | Glutathione S-transferase, GSTomega            |
| Nemve1 80855      | Glutathione S-transferase, GSTomega            |
| Nemve1 202412     | Glutathione S-transferase, GSTomega            |
| Nemve1 198281     | Glutathione S-transferase, GSTpi               |
| Nemve1 188039     | Glutathione S-transferase, GSTpi               |
| Nemve1 192646     | Glutathione S-transferase, GSTsigma            |
| Nemve1 162659     | Glutathione S-transferase, GSTsigma            |
| Nemve1 236609     | Glutathione S-transferase, GSTsigma            |
| Nemve1 216187     | Glutathione S-transferase, GSTsigma            |
| Nemve1 179696     | Glutathione S-transferase, GSTsigma            |
| Nemve1 113255     | Glutathione S-transferase, GSTsigma            |
| Nemve1 195944     | MAPEG family                                   |
| Nemve1 238552     | MAPEG family                                   |
| Nemve1 240887     | MAPEG family                                   |
| Nemve1 248820     | MAPEG family                                   |
| Nemve1 82570      | MAPEG family                                   |
| Nemve1 78952      | Sulfotransferase SULT3A                        |
| Nemve1 79079      | Sulfotransferase SULT3A                        |
| Nemve1 106039     | Sulfotransferase SULT3A                        |
| Nemve1 106239     | Sulfotransferase SULT3A                        |
| Nemve1 86774      | Sulfotransferase SULT3A                        |
| Nemve1 111868     | Sulfotransferase SULT3A                        |
| Nemve1 199956     | Sulfotransferase SULT3A                        |
| Nemve1 149898     | Sulfotransferase SULT4                         |
| Nemve1 113472     | Sulfotransferase SULT3B                        |
| Nemve1 111938     | Sulfotransferase SULT3A                        |
| Nemve1 247365     | Sulfotransferase SULT4                         |
| Nemve1 231277     | Sulfotransferase SULT3B                        |
| Nemve1 2578       | Sulfotransferase SULT4                         |
| Nemve1 207647     | Sulfotransferase SULT4                         |
| Nemve1 34192      | Sulfotransferase keratan/chondroitin sulfatase |
| Nemve1 202521     | Sulfotransferase keratan/chondroitin sulfatase |
| Nemve1 20906      | Sulfotransferase SULT4                         |
| Nemve1 207646     | Sulfotransferase keratan/chondroitin sulfatase |
| Nemve1 207648     | Sulfotransferase keratan/chondroitin sulfatase |
| Nemve1 182889     | Sulfotransferase keratan/chondroitin sulfatase |
| Nemve1 122621     | Sulfotransferase keratan/chondroitin sulfatase |
| Nemve1 107994     | Sulfotransferase keratan/chondroitin sulfatase |
| Nemve1 122091     | UDP-glucuronosyl and UDP-glucosyl transferase  |
| Nemve1 116699     | UDP-glucuronosyl and UDP-glucosyl transferase  |
| Nemve1 240864     | UDP-glucuronosyl and UDP-glucosyl transferase  |
| Nemve1 170378     | UDP-glucuronosyl and UDP-glucosyl transferase  |
| Nemve1 111143     | UDP-glucuronosyl and UDP-glucosyl transferase  |
| Nemve1 90373      | UDP-glucuronosyl and UDP-glucosyl transferase  |
| Nemve1 11044      | UDP-glucuronosyl and UDP-glucosyl transferase  |
| Nemve1 140893     | UDP-glucuronosyl and UDP-glucosyl transferase  |
| Nemve1 122110     | UDP-glucuronosyl and UDP-glucosyl transferase  |

## Supplemental Table S4

| JGI Protein Model | Gene family assignment                                |
|-------------------|-------------------------------------------------------|
| Nemve1 103289     | catalase                                              |
| Nemve1 236349     | manganese superoxide dismutase                        |
| Nemve1 231554     | Iron/manganese superoxide dismutase                   |
| Nemve1 94316      | Iron/manganese superoxide dismutase                   |
| Nemve1 165732     | Copper/zinc superoxide dismutase                      |
| Nemve1 234825     | Copper/zinc superoxide dismutase                      |
| Nemve1 227361     | Copper chaperone for copper/zinc superoxide dismutase |
| Nemve1 3582       | Extracellular Copper/zinc superoxide dismutase        |
| Nemve1 110690     | Phytochelatin synthase                                |
| Nemve1 136743     | Phytochelatin synthase                                |
| Nemve1 202690     | Phytochelatin synthase                                |
| Nemve1 96744      | Phytochelatin synthase                                |
| Nemve1 90698      | Glutathione Peroxidase                                |
| Nemve1 93209      | Glutathione Peroxidase                                |
| Nemve1 55851      | Glutathione Peroxidase                                |
| Nemve1 140021     | Glutathione Peroxidase                                |
| Nemve1 225874     | Glutathione Peroxidase                                |
| Nemve1 131086     | Glutathione Peroxidase                                |
| Nemve1 63846      | Glutathione Peroxidase                                |
| Nemve1 238222     | Glutathione Peroxidase                                |
| Nemve1 81508      | Glutathione Peroxidase                                |
| Nemve1 81388      | Glutathione Peroxidase                                |
| Nemve1 114609     | Glutathione Peroxidase                                |
| Nemve1 9969       | Glutathione Peroxidase                                |
| Nemve1 180776     | Glutamate-cysteine ligase                             |
| Nemve1 75832      | Glutamate-cysteine ligase                             |
| Nemve1 130991     | Eukaryotic glutathione synthase                       |
| Nemve1 105627     | Hsp20 protein                                         |
| Nemve1 105643     | Hsp20 protein                                         |
| Nemve1 127462     | Hsp20 protein                                         |
| Nemve1 127468     | Hsp20 protein                                         |
| Nemve1 127482     | Hsp20 protein                                         |
| Nemve1 127489     | Hsp20 protein                                         |
| Nemve1 127508     | Hsp20 protein                                         |
| Nemve1 127544     | Hsp20 protein                                         |
| Nemve1 129111     | Hsp20 protein                                         |
| Nemve1 129113     | Hsp20 protein                                         |
| Nemve1 142100     | Hsp20 protein                                         |
| Nemve1 143593     | Hsp20 protein                                         |
| Nemve1 143610     | Hsp20 protein                                         |
| Nemve1 156025     | Hsp20 protein                                         |
| Nemve1 160645     | Hsp20 protein                                         |
| Nemve1 239200     | Hsp20 protein                                         |
| Nemve1 46373      | Hsp20 protein                                         |
| Nemve1 86804      | Hsp20 protein                                         |
| Nemve1 86017      | Hsp70 protein                                         |
| Nemve1 216823     | Hsp70 protein                                         |
| Nemve1 189485     | Hsp70 protein                                         |
| Nemve1 195315     | Hsp70 protein                                         |
| Nemve1 234533     | Hsp70 protein                                         |
| Nemve1 233881     | Hsp70 protein                                         |

| <b>JGI Protein Model</b> | <b>Gene family assignment</b> |
|--------------------------|-------------------------------|
| Nemve1 172038            | Hsp70 protein                 |
| Nemve1 243437            | Hsp70 protein                 |
| Nemve1 79267             | Hsp70 protein                 |
| Nemve1 178640            | Hsp90 protein                 |
| Nemve1 181671            | Hsp90 protein                 |
| Nemve1 162107            | Hsp90 protein                 |
| Nemve1 153358            | Hsp90 protein                 |
